1 **Incidental Temporal Binding in Rats:**  
2 **A Novel Behavioral Task Relevant to Episodic Memory**

3 Dominika Radostova,<sup>1,2</sup> Daniela Kuncicka,<sup>1,2</sup> Branislav Krajcovic,<sup>1,3</sup> Lukas Hejtmanek,<sup>1</sup> Tomas Petrasek,<sup>1,4</sup> Jan  
4 Svoboda,<sup>1</sup> Ales Stuchlik,<sup>1</sup> Hana Brozka<sup>1,\*</sup>

5 <sup>1</sup>Institute of Physiology, Czech Academy of Sciences, Videnska 1083, 142 20 Prague, Czechia

6 <sup>2</sup>Second Faculty of Medicine, Charles University, V Uvalu 84, 150 06 Prague, Czechia

7 <sup>3</sup>Third Faculty of Medicine, Charles University, Ruska 2411, 100 00 Prague, Czechia

8 <sup>4</sup>National Institute of Mental Health, Topolova 748, 250 67 Klecany, Czechia

9 \*corresponding author ([hana.brozka@fgu.cas.cz](mailto:hana.brozka@fgu.cas.cz))

10

11 **ABSTRACT**

12 We designed a behavioral task called One-Trial Trace Escape Reaction (OTTER), in which rats incidentally  
13 associate two temporally discontinuous stimuli: a neutral acoustic cue (CS) with an aversive stimulus (US)  
14 which occurs two seconds later (CS-2s-US sequence). Rats are first habituated to two similar  
15 environmental contexts (A and B), each consisting of an interconnected dark and light chamber. Next, rats  
16 experience the CS-2s-US sequence in the dark chamber of one of the contexts (either A or B); the US is  
17 terminated immediately after a rat escapes into the light chamber. The CS-2s-US sequence is presented  
18 only once to ensure the incidental acquisition of the association. The recall is tested 24 h later when rats  
19 are presented with only the CS in the alternate context (B or A), and their behavioral response is observed.  
20 Our results show that 59 % of the rats responded to the CS by escaping to the light chamber, although  
21 they experienced only one CS-2s-US pairing. The OTTER task offers a flexible high throughput tool to study  
22 memory acquired incidentally after a single experience. Incidental acquisition of association between  
23 temporally discontinuous events is highly relevant to episodic memory formation.

## 24 KEYWORDS

25 Associative learning; episodic-like memory; temporal binding; active avoidance; conditioning

## 26 1. INTRODUCTION

27 Episodic memory is the ability to retain and recall knowledge of personally experienced past events [1].  
28 These events are often composed of successive sub-events separated by time gaps and might be  
29 experienced as a single memory [2]. The ability to form associations between events, known as temporal  
30 binding, is likely an essential prerequisite for creating complex episodic memories [3]. Another aspect of  
31 episodic memories is that they are acquired incidentally, i.e., we remember events we did not intend to  
32 memorize. In an experimental setup, incidental memory can be tested in situations when subjects are  
33 unaware that they will be tested on recall [4–6]. We believe that the acquisition of episodic-like memory  
34 should not require conditioning or pre-training; moreover, evidence suggests that mechanisms of  
35 incidental memory acquisition might differ from acquisition with intent [7–10].

36 To understand the neural mechanism of episodic memory, it is vital first to elucidate the neural  
37 mechanisms of acquisition and retrieval of temporally bound sub-events. The first step towards this goal  
38 is to develop a valid and reliable behavioral task. Our goal was to develop a simple temporal binding task  
39 with a clear behavioral response and a balanced success ratio. We focused on a one-trial design to ensure  
40 that memory was acquired incidentally. To achieve this, we took advantage of two natural behavioral  
41 tendencies of rodents: rodents avoid brightly lit environments [11] and actively escape an immediate  
42 threat [12,13].

43 Our task, which we named One-Trial Trace Escape Reaction (OTTER), consists of three phases:  
44 habituation, pairing, and recall (Figure 1A–C). The purpose of habituation is to familiarize rats with a novel

45 environment and to reduce their exploratory activity. Each rat is habituated to two similarly constructed  
46 environmental contexts: an oval-shaped context A and a slightly larger rectangular-shaped context B  
47 (Figure 1A). Both contexts consist of one dark and one light chamber and are separated by a partition with  
48 a rectangular opening. This design allows us to exploit the natural tendency of rodents to avoid bright  
49 light. Even if rats are free to move between both chambers, they strongly prefer the dark chamber. To  
50 olfactorily distinguish both contexts, context A is cleaned with an alcohol-based wash, while context B is  
51 cleaned using a vinegar-based wash.

52 **Figure 1. Schematic overview of One-Trial Trace Escape Reaction (OTTER).** (A) A rat is initially habituated to  
53 environmental contexts A and B in alternating daily sessions. (B) During the pairing session, the rat hears a sound  
54 cue (CS) while in the dark chamber of one of the two contexts (context A or B); two seconds later, the rat receives a  
55 foot shock (US) that is terminated once the rat transfers to the light chamber. (C) The recall of CS-2s-US association  
56 is tested in the recall session, which occurs 24 hours later in the alternate context (context B or A). The CS is delivered  
57 when the rat settles in the dark chamber, and the rat's reaction is observed. Upon hearing the CS, the rat either  
58 escapes into the light chamber ('responder') or stays in the dark chamber ('non-responder').

59         During the pairing session, rats experience two novel stimuli separated by a time gap (Figure 1B).  
60 Each rat is first allowed to explore the apparatus of context A or B exactly as it would during the  
61 habituation sessions. When the rat is settled in the dark chamber, it first hears a three-second acoustic  
62 cue (the conditioned stimulus CS), then receives an electric foot shock (unconditioned stimulus, US) two  
63 seconds after the CS stops. The US is terminated immediately after the rat escapes to the light chamber.  
64 This is the opportunity for the rat to incidentally associate the CS with the US (CS-2s-US) and learn that  
65 escape to the light chamber provides safety from the US.

66         The association between the CS and US is tested during the recall session 24 hours later (Figure  
67 1C). Unlike in traditional active avoidance tasks, the recall in OTTER is tested in a different environmental  
68 context. Testing the recall in a different environmental context renders the association between the US

69 and environmental context irrelevant; fear-related behavioral responses are therefore only attributable  
70 to the association between the CS and US. The recall session begins by placing the rat in the dark chamber  
71 of the environmental context other than the context of the pairing session (B or A). If at least 15 minutes  
72 elapsed and the rat rests in the dark chamber, the CS is delivered, and the rat's reaction is observed. There  
73 are two possible reactions: either the rat escapes into the light chamber ('responder') or remains in the  
74 dark chamber ('non-responder'). Here we present normative data from the OTTER task and discuss its  
75 strengths, limitations, and possible applications.

## 76 2. METHODS

### 77 2.1 Animals

78 Adult male Wistar rats (ENVIGO; 12–14 weeks old) were used in the experiment (n = 32). Upon arrival, the  
79 28-day-old rats were housed in standard laboratory cages (50 x 25 x 25 cm), two animals per cage.  
80 Laboratory food and tap water were supplied *ad libitum*. The room where the animals were kept was  
81 ventilated with a constant temperature of 22 °C and 50% humidity. The rats were kept on a 12-hour light  
82 cycle, with light being turned on daily at 6 am.

83 Before the start of the OTTER task, all rats were handled by the experimenter for 3 minutes daily  
84 for four days. All experiments were conducted during the light phase of the day (9 am to 1 pm) because  
85 rats show lower locomotion during that time [14]. All animal procedures were approved by the Ethical  
86 Committee of the Czech Academy of Sciences and complied with the Animal Protection Act of the Czech  
87 Republic and EU directive 2010/63/EC.

### 88 2.2 Apparatus

89 Two modified TSE multi-conditioning shuttle boxes (TSE Systems GmbH, Germany) were used in the  
90 experiment. Each shuttle box consisted of two interconnected 24 x 47 cm chambers. The first chamber of

91 both shuttle boxes was built from transparent acrylic glass (light chamber), while the second chamber was  
92 created using dark opaque acrylic glass (dark chamber). A dark opaque lid was used to cover the dark  
93 chamber, resulting in light intensity of less than 3 lx in the chamber's center. The light chamber was left  
94 uncovered; moreover, we added another light source to reach a light intensity of 1090 lx in the chamber's  
95 center. Intense light is highly uncomfortable for rodents [15], and aversively motivated rats spend most  
96 of their time in the dark chamber. The chambers were separated by a custom-made partition with a wide  
97 opening (4 x 40 cm central opening, custom-made) made of black acrylic glass.

98           The shuttle boxes were soundproofed and equipped with a speaker. Once triggered by the TSE  
99 software, the speaker delivered a 2400 Hz sound cue. The sound cue was delivered at 80 dB SPL intensity  
100 for 2 seconds. The walls of both chambers were equipped with infrared devices that registered the  
101 animal's location within the apparatus. The floor of both chambers consisted of a metallic grid with 0.5  
102 cm diameter metal rods spaced 1.5 cm apart. When prompted, the metal rods delivered a 1.0 mA pulsatile  
103 electric stimulus with a 400 ms period (a 200 ms, 1 mA stimulus followed by 200 ms no stimulus) to the  
104 animal in the dark chamber.

105           The two TSE multi-conditioning shuttle boxes were visually and olfactorily distinct so that one  
106 shuttle box served as environmental context A and the other as environmental context B. The walls of the  
107 light chamber were decorated with an aquarium scene on a circular insert in context A, while in context  
108 B, the walls of the light chamber were decorated with black stripes. Context A was cleaned with an alcohol-  
109 based wash, while context B was cleaned with a vinegar-based wash.

110           We presume the OTTER task can be conducted using any similar apparatus where the above-  
111 described general principles are adhered to and will deliver comparable results to those using TSE shuttle  
112 boxes.

113   2.3 Habituation, Pairing, and Recall

114 Each rat was individually habituated to the environmental context A and B twice in a series of four 15-  
115 minute habituation sessions; only one habituation session took place every day, and the sessions in  
116 contexts A and B alternated daily. At the start of every habituation, each rat was placed in the dark  
117 chamber and was left to explore both chambers freely.

118         Following habituation, rats were conditioned to CS-2s-US pairing. The pairing took place in the  
119 same context as the first habituation session: rats first exposed to context A experienced CS-2s-US pairing  
120 in context A and vice versa for context B. The beginning of the pairing session closely resembled the  
121 habituation session, as rats were allowed to move freely through the apparatus for 15 minutes. At this  
122 point, rats did not transfer between the chambers at all or transferred only seldom. Following the 15-  
123 minute interval, a to-be-conditioned stimulus – a three-second sound cue – was delivered. We advise that  
124 the CS should be delivered with caution, as delivering the CS at an inappropriate moment might hamper  
125 the CS-2s-US acquisition. The rat must be located in the dark chamber, resting and not facing the opening  
126 in the partition between chambers (to avoid bias toward escaping through the ‘door’). Two seconds after  
127 the CS stopped, an electric foot shock was delivered (US) to the rat by the metallic floor grid. The US was  
128 automatically terminated if the rat’s position was registered in the light chamber or if the rat did not leave  
129 the dark chamber in 20 seconds. Rats that did not escape to the light chamber were excluded and did not  
130 proceed to the recall session. Rats that escaped were returned to their home cage immediately after the  
131 escape and were left undisturbed for the next 24 hours, after which they were tested for recall.

132         The recall of the CS-2s-US pairing took place in the alternate context, i.e., if the pairing took place  
133 in context A, the recall was tested in context B. Recall session resembled the pairing session with the  
134 exception that the US was not delivered. The CS was delivered no sooner than after 15 minutes and only  
135 if the rat rested in the dark chamber. Following the CS delivery, the rat’s response was observed. Rats that  
136 escaped to the light chamber within 10 seconds of the CS start were considered ‘responders,’ while those  
137 that remained in the dark chamber were considered ‘non-responders.’

## 138 2.4 Statistics

139 IBM SPSS Statistics (version 25.0, IBM Corp., 2017) was used to analyze behavioral data. More than half  
140 of the data did not meet parametric assumptions; therefore, we used non-parametric tests in all statistical  
141 analyses (Mann-Whitney test, Friedman test, Wilcoxon-signed rank test, Kruskal-Wallis test, Fisher's exact  
142 test). The significance threshold was set to  $p = 0.05$ .

## 143 2.5 Data visualization

144 Data visualizations were created in IBM SPSS Statistics (version 25.0, IBM Corp., 2017), Corel, and R using  
145 the visualization library ggplot2 [16]. Heatmaps were obtained using the two-dimensional kernel density  
146 estimation function, kde2d, from the MASS library [17].

# 147 3. RESULTS

## 148 3.1 Habituations

149 During the four 15-minute habituation sessions in environmental contexts A and B, rats preferred the dark  
150 chamber in both contexts (Figure 2A). We found that rats transferred significantly less to the light chamber  
151 in context B than in context A during the first habituation session (Mann-Whitney test: hab 1:  $U = 55.00$ ,  
152  $p = 0.008$ ). The difference between number of transfers to the light chamber in context A and B was not  
153 significant during any other habituation session (Figure 2B) (Mann-Whitney test: hab 2:  $U = 112.50$ ,  $p =$   
154  $0.775$ ; hab 3:  $U = 72.00$ ,  $p = 0.057$ ; hab 4:  $U = 116.50$ ,  $p = 0.899$ ). For plots of movement through the  
155 apparatus by the individual rats during the 15-minute habituation sessions, see Supplementary figure 1.  
156 We found no significant difference in the time spent in the dark chamber (Supplementary figure 2) (Mann-  
157 Whitney test: hab 1:  $U = 94.00$ ,  $p = 0.315$ ; hab 2:  $U = 96.50$ ,  $p = 0.361$ ; hab 3:  $U = 97.00$ ,  $p = 0.373$ ; hab 4:  
158  $U = 88.00$ ,  $p = 0.213$ ) in context A and B during any of the four habituation sessions.

159 **Figure 2. Chamber preference and transfers to the light chamber during 15 min habituation sessions.** (A) Where  
160 animals were likely to be during each habituation session; blue indicates minimal presence, and red signifies a  
161 frequent stay. Rats were most often present in the dark chamber of contexts A and B during each session; the time  
162 spent in the dark chamber did not significantly differ between contexts A and B during habituation sessions. (B)  
163 Transfers to the light chamber in contexts A and B during habituation sessions. Rats transferred to the light chamber  
164 significantly less in context B than in context A during the first habituation session ( $p < 0.01$ ), but not during any  
165 other habituation session.

166 **Supplementary figure 1. Movement of each rat through the apparatus during four 15-minute habituation sessions.**  
167 Each horizontal line corresponds to one animal. Black represents a stay in the dark chamber; gray represents a stay  
168 in the light chamber. Symbols “A” and “B” on the vertical axis correspond to the environmental context of the rat’s  
169 habituation. Context A was oval-shaped and cleaned with an alcohol-based wash, while context B was rectangular-  
170 shaped and cleaned with a vinegar-based wash.

171 **Supplementary figure 2. Time spent in chambers of contexts A and B by rats during habituation sessions.** Each rat  
172 ( $N = 32$ ) received two habituation sessions in each context in an alternating manner. Starting context was chosen  
173 randomly for each rat. Rats preferred the dark chamber and spent very little time in the light chamber in both  
174 contexts across habituation sessions. The difference in the time spent in the dark chamber was significantly higher  
175 than the time spent in the light chamber in each context and during all five habituation sessions (Mann-Whitney  
176 test: Hab 1 context A:  $U = 0.000$ ,  $p = 0.000$ ; Hab 1 context B:  $U = 0.000$ ,  $p = 0.000$ ; Hab 2 context A:  $U = 1.000$ ,  $p =$   
177  $0.000$ , Hab 2 context B:  $U = 0.000$ ,  $p = 0.000$ ; Hab 3 context A:  $U = 1.000$ ,  $p = 0.000$ , Hab 3 context B:  $U = 6.000$ ,  $p =$   
178  $0.000$ ; Hab 4 context A:  $U = 1.000$ ,  $p = 0.000$ , Hab 4 context B:  $U = 0.000$ ,  $p = 0.000$ . Error bars indicate SEM, \*  
179 indicates  $p < 0.05$ .

180 As each rat was habituated to the same context twice, we also assessed if the number of transfers  
181 to the light chamber and the time spent in the dark chamber differed between these two habituation  
182 sessions. We found that in group 1 (first habituation in context A) the number of transfers to the light  
183 chamber did not significantly change between the two sessions in neither context A (Wilcoxon signed-



184 rank test:  $Z = -0.473$ ,  $p = 0.658$ ) nor in context B ( $Z = -0.199$ ,  $p = 0.873$ ). Similarly, we found no significant  
185 difference in the time spent in the dark chamber between the two sessions in neither context A (Wilcoxon  
186 signed-rank test:  $Z = -0.879$ ,  $p = 0.379$ ) nor in context B ( $Z = -0.314$ ,  $p = 0.753$ ) in group 1. In group 2 (first  
187 habituation in context B), we observed similar behavior: the number of transfers to the light chamber did  
188 not significantly change between the two habituations sessions in context A (Wilcoxon signed-rank test:  
189  $Z = -0.063$ ,  $p = 0.964$ ) nor in context B ( $Z = -1.129$ ,  $p = 0.283$ ). Time spent in the dark chamber also did not  
190 significantly differ between the two sessions in the same context (Wilcoxon signed-rank test:  $Z = -0.549$ ,  
191  $p = 0.583$ ;  $Z = -0.879$ ,  $p = 0.379$  for context A and context B, respectively).

### 192 3.2 Pairing sessions

193 At the beginning of the pairing session, 24 rats were randomly selected to be presented with CS-2s-US  
194 (test group) and 8 rats to be presented with CS only (control group). One rat in the test group was excluded  
195 at the beginning of the pairing session as it lingered in the light chamber, and CS-2s-US could not be  
196 presented. All other test group rats ( $N = 23$ ) were presented with CS-2s-US and escaped to the light  
197 compartment within 20 seconds. The average latency to escape was  $10.0 \pm 0.9$  seconds (SEM) from the  
198 CS onset. Rats that responded to CS during the recall the next day escaped the US on average slightly  
199 faster than future non-responders (9.3 s compared to 11.0 s) (Figure 4C); however, this difference was  
200 not statistically significant (Mann-Whitney test:  $U = 29.000$ ,  $p = 0.601$ ). None of the control rats ( $N = 8$ )  
201 transferred to the light chamber upon hearing the CS.

202 **Figure 4. The OTTER task normative data.** (A) The pie chart illustrates animals included in the study ( $N = 25$ ) and  
203 animals excluded before the pairing ( $N = 1$ ) and the recall session ( $N = 6$ ). (B) Ratios of responders ( $N = 10$ ), non-  
204 responders ( $N = 7$ ) and controls ( $N = 8$ ) in the group of 25 animals included in the study. Animals in the control group  
205 did not respond to CS during the recall phase. (C) Latencies to transfer to the light chamber during the pairing (since  
206 CS-2s-US start) by responders and non-responders. Non-responders transferred to the light chamber after  $11.0 \pm 1.9$   
207 seconds and responders after  $9.3 \pm 0.9$  seconds. (D) Latencies to transfer to the light chamber by responders during

208 pairing (since CS-2s-US start) and recall (since CS start; CS length was 2 seconds). Responders transferred to the light  
209 chamber after  $9.3 \pm 0.9$  seconds during the pairing and after  $5.1 \pm 0.9$  seconds during the recall. (E) Time spent in  
210 the dark chamber during the habituation preceding recall by non-responders, responders, and controls. (F) Transfers  
211 to the light chamber during the habituation preceding recall by non-responders, responders, and controls.

212 During the habituation session preceding recall, rats transferred to the light chamber significantly  
213 less than during habituation before CS-2s-US pairing (Wilcoxon signed-rank test:  $Z = -2.762$ ,  $p = 0.004$ )  
214 (pairing session habituation Mdn = 5.5, recall session habituation Mdn = 3) (Figure 3A). Although rats  
215 appeared to spend more time in the dark chamber during habituation preceding recall (Mdn = 843.8 s)  
216 than during habituation before pairing (Mdn = 814.4 s), the difference was not significant (Wilcoxon  
217 signed-rank test:  $Z = -0.843$ ,  $p = 0.410$ ) (Figure 3B).

218 **Figure 3. Comparison of transfers to the light chamber and time spent in the dark chamber during pairing and**  
219 **recall session. (A)** Transfers to the light chamber during pairing and recall session habituations (data from contexts  
220 A and B combined). Rats transferred to the light chamber significantly less during recall session habituation ( $p <$   
221  $0.01$ ). **(B)** Time spent in the dark chamber during pairing and recall session habituations (data from contexts  
222 combined). The difference in time spent in the dark chamber between these two sessions did not significantly differ.

### 223 3.3 Recall sessions

224 During the recall session, the CS was successfully presented to 17 rats from the test group and 8 animals  
225 from the control group; 6 rats from the test group were excluded from the experiment as they lingered in  
226 the light chamber during the time of the intended CS presentation (Figure 4A). In the test group, 59 % ( $N$   
227 = 10) of rats moved to the light chamber within 10 seconds of the start of CS (Figure 4B). The average time  
228 to escape was  $5.1 \pm 0.9$  seconds (SEM) from the CS onset (Figure 4D). None of the control rats ( $N = 8$ )  
229 transferred to the light chamber in response to the CS. The number of responders in the test group was  
230 significantly higher than in the control group (Fisher's exact test:  $p$  (two-tailed) = 0.008). We found no  
231 statistically significant difference in the time spent in the dark chamber (Kruskal-Wallis test:  $H(2) = 1.674$ ,

232  $p = 0.433$ ) (Figure 4E) or in the number of transfers to the light chamber (Kruskal-Wallis test:  $H(2) = 1.384$ ,  
233  $p = 0.501$ ) between responders, non-responders and controls during the habituation session before recall  
234 (Figure 4F).

## 235 DISCUSSION

236 We designed a behavioral task – OTTER – in which a single event is sufficient for an animal to incidentally  
237 acquire knowledge of a contingency existing over a time gap. The animal later actively exhibits this  
238 knowledge in a way that allows unambiguous evaluation of memory acquisition. The task utilizes species-  
239 specific preferences and naturally occurring behavior, which greatly reduces the amount of training  
240 needed and increases the task's ecological validity. The OTTER task is a trace conditioning task that  
241 employs active avoidance to capture an important feature of naturalistic human episodic memory: the  
242 incidental memory acquisition of an event experienced only once.

243 The OTTER does not need pre-training or 'priming' the animals to anticipate a behaviorally  
244 relevant event. The pre-training in existing rodent paradigms can be twofold: shaping the desired  
245 response behavior or repeated exposure to stimuli. Both types of pre-training create an expectancy of  
246 contingency. For example, in trace fear conditioning, the CS-trace-US is presented more than once [18,19].  
247 Although rodents may associate CS with US even after a single CS-trace-US exposure in trace fear  
248 conditioning, no observable variable could indicate the acquired knowledge. Freezing, an outcome  
249 measured in trace fear conditioning and similar tasks, is a response associated with an absence of an  
250 escape route [20] and might indicate behavioral despair as no action can avert the stressor. In this context,  
251 it is possible that freezing behavior emerges only after repeated CS-trace-US presentation. The OTTER task  
252 bypasses the potentially non-specific freezing response because a single pairing session results in a clear  
253 avoidance response during the recall session in rats.

254           In the OTTER task, active avoidance behavior offers an unambiguous binary measure of recall so  
255 that each animal can be confidently singled out as a ‘responder’ or ‘non-responder.’ In contrast, fear  
256 conditioning tests and novel object recognition tasks use a continuous variable as an indicator of learning,  
257 such as freezing or duration of exploration. When a continuous variable is used to classify animals into  
258 discrete groups, we first need to set a threshold value. Choosing the threshold value may prove  
259 challenging, and even then, it is often unclear how confident we can be about classifying animals just  
260 around the threshold values. Using a continuous outcome variable as a basis for classification might  
261 therefore provide unclear results. Rodent tasks with unambiguous output variables usually involve  
262 ‘declaring’ the knowledge by entering a correct place or pressing a correct button [5,21]. However,  
263 extensive pre-training is often required since the declarative behavior must be shaped first (usually  
264 approach behavior). The need for long pre-training to achieve declarative behavior precludes the study of  
265 incidentally acquired memories. In the OTTER task, the response is binary, and rats naturally exhibit the  
266 chosen declarative behavior without prior training.

267           To confidently ascribe the escape reaction to the CS-2s-US association, we must first establish an  
268 invariant baseline behavior — the animal has to stay in the dark chamber most of the time on its own  
269 accord. To this aim, we first explored the influence of rat strain on behavior within the same  
270 environmental context and found that Wistar rats display the most appropriate behavior for the OTTER  
271 task. In our experiments, Wistar rats spent most of the time in the dark chamber and transferred less  
272 frequently to the light chamber than Sprague-Dawley and Long-Evans rats (unpublished results). Second,  
273 we changed the size and shape of the opening in the partition between chambers which further reduced  
274 the time Wistar rats spent in the light chamber (unpublished results). By implementing these measures,  
275 rats seldom spontaneously move to the light chamber; hence it is very likely that when an animal  
276 ‘responds’ to the CS, it does so because it remembers the CS-2s-US association and not because of random  
277 exploration.

278           As long as the general principle of the OTTER task is adhered to, that is, controlling animal  
279 behavior by balancing conflicting species-specific behavioral tendencies, the OTTER task is flexible and can  
280 be embodied even by different physical instances. We are currently developing a second variant of the  
281 OTTER task with the working title ‘cold-OTTER.’ In the ‘cold-OTTER’ task, the invariant behavior is achieved  
282 by utilizing the rat’s and mice’s preference for warmth, which results in the avoidance of the cold sub-  
283 area of the apparatus. The flexible nature of the OTTER task allows adapting the task for different species  
284 and research contexts.

285           The OTTER task offers a high temporal precision of the recall event, making it an auspicious task  
286 for detailed studies of retrieval mechanisms. There is only a brief time window when an animal retrieves  
287 information and acts upon it. Such pinpointing of the recall event is difficult in tasks where a behavioral  
288 response is registered as a frequency of behavior during a time interval (freezing or exploration duration).  
289 The temporal precision of the recall event offered by the OTTER task can be especially advantageous if  
290 combined with high temporal resolution methods, such as electrophysiology [22] or calcium imaging [23].  
291 The OTTER task might therefore serve as a valuable behavioral paradigm for a detailed study of neural  
292 mechanisms involved in episodic-like memory retrieval.

293           We consider OTTER highly relevant to episodic memory because the successful recall of CS-2s-US  
294 in OTTER meets several criteria of episodic memory: a) the memory was incidentally encoded [6], b)  
295 encoding occurred after a single exposure [24], c) there was no pre-training involved [25], d) rat behavior  
296 observed threshold retrieval dynamics [26], and e) rats were able to retrieve information flexibly in a  
297 different context [27]. Considering these five criteria, OTTER is a good model of several putative aspects  
298 of episodic memory. However, the OTTER task does not meet the episodic-like memory criterion of  
299 demonstration of what-where-when knowledge of past experiences [28] because the flight in response  
300 to the CS does not indicate if the rat remembers where and when it experienced CS-2s-US. Rather than  
301 puzzling over whether OTTER is ‘an episodic-like memory task’ or not, we find it more helpful to focus on

302 the fact that the OTTER task captures several essential aspects of episodic memory and enables us to  
303 study them.

304 The OTTER task could be utilized to study the extinction of incidentally acquired memory based  
305 on a single exposure. This aspect is highly relevant to several neuropsychiatric disorders, especially post-  
306 traumatic stress disorder (PTSD). In this sense, the OTTER task could serve as an ecologically valid memory  
307 acquisition/extinction model of PTSD. We expect the extinction curve of CS-2s-US association could be  
308 influenced in both directions (faster/slower) by behavioral manipulations during or after the recall  
309 session.

310 As in any behavioral task, there are limitations to the OTTER task. First, the one-trial nature of the  
311 OTTER task precludes repeated measurements often required to accumulate sufficient amounts of data  
312 (e.g., in electrophysiology). This limitation stems from probing the incidental one-trial aspects of episodic-  
313 like memory and seems unavoidable. Second, it cannot be ruled out that ‘non-responders’ did form the  
314 CS-2s-US association but failed to act upon it. In assessing the recall, we rely on motoric output that is  
315 only indirectly related to the animal’s mental state. However, we found no significant difference in time  
316 spent freezing at the start of the recall session (Supplementary figure 3A) and following the CS  
317 presentation (Supplementary figure 3B) between ‘non-responders,’ ‘responders,’ and controls in our  
318 preliminary experiments. Our results suggest that ‘non-responders’ did not fail to learn that to avoid the  
319 US, they needed to escape to the light chamber but did not associate the US with either CS or the dark  
320 chamber at all.

321

322 **Supplementary figure 3. Freezing at the beginning of the recall session and after the CS presentation.** Freezing was  
323 assessed manually from video recordings by a blinded experimenter. As a freezing, we considered any lack of  
324 movement except for breathing. **(A)** Time spent freezing (s) during the first minute of the recall session. There was  
325 no significant difference in time spent freezing between ‘responders,’ ‘non-responders,’ and control rats (Kruskal-

326 Wallis test:  $H = 6.436$ ,  $p = 0.092$ ). **(B)** Time spent freezing (s) during one minute after CS presentation. We found no  
327 significant difference in time spent freezing between ‘non-responders’ and control rats (Mann-Whitney test:  $U =$   
328  $11.00$ ,  $p = 0.831$ ). This suggests that ‘non-responders’ did not recall the CS-2s-US association.

329

330 In conclusion, we designed a temporal binding task called OTTER that is adaptable, gives rapid  
331 results, and is easy to conduct. Due to the association of temporarily discontinuous events, the OTTER  
332 task can vastly promote our understanding of the neural mechanisms of temporal binding and possibly  
333 memory extinction. The behavioral response in the OTTER task is ecologically valid because it takes  
334 advantage of the natural behavioral tendencies of rodents. We demonstrated that rats could utilize the  
335 knowledge acquired from a single experience and use it to their advantage in a different context: rats  
336 demonstrated the same behavior that resulted in the termination of the unpleasant stimulus they  
337 experienced 24 hours earlier. We observed no ‘ceiling effect’ and a good balance between ‘responders’  
338 and ‘non-responders’(close to 1:1), which may be valuable during tracing of neural changes in the early  
339 episodic-like memory acquisition. The OTTER task extends the current range of trace conditioning tasks,  
340 capturing the one-trial and incidental nature of encoding, and offers high temporal precision regarding  
341 when the memory recall occurred. Another notable advantage of the OTTER task is the binary outcome.  
342 The rat either crosses to the light chamber or does not; thus, there is no need to set an arbitrary threshold  
343 for the outcome variable. The OTTER task shares aspects with episodic memory due to its incidental,  
344 single-trial character with minimal training requirements.

## 345 ACKNOWLEDGEMENTS

346 This work was supported by Czech Science Foundation (GACR) grant 20-00939S. Institutional support for  
347 IPHYS was provided by RVO: 67985823.

348 We would like to thank David Levcik for valuable feedback on the initial draft of the manuscript.

## 349 AUTHOR CONTRIBUTIONS

350 Conceptualization, H.B., D.R., and B.K.; Methodology, D.R., and D.K.; Investigation, D.R. and D.K.;  
351 Resources, A.S, and J.S.; Writing – Original Draft, D.R., H.B, and B.K.; Writing – Review & Editing, H.B., D.K.,  
352 B.K., T.P., and L.H.; Visualization, L.H., D.K., and H.B.; Supervision, H.B., and A.S.; Funding Acquisition, A.S.

## 353 DECLARATION OF INTERESTS

354 The authors have declared that no competing interests exist.

## 355 REFERENCES

- 356 1. Crystal JD. Animal models of episodic memory. *Comp Cogn Behav Rev*. 2018;13:105–22.
- 357 2. Tulving E. Episodic memory: From mind to brain. *Annu Rev Psychol*. 2002 Feb;53(1):1–25.
- 358 3. DuBrow S, Davachi L. Temporal binding within and across events. *Neurobiol Learn Mem*. 2016  
359 Oct;134:107–14.
- 360 4. Zhou W, Crystal JD. Validation of a rodent model of episodic memory. *Anim Cogn*. 2011 May  
361 17;14(3):325–40.
- 362 5. Zhou W, Hohmann AG, Crystal JD. Rats answer an unexpected question after incidental encoding.  
363 *Current Biology*. 2012 Jun 19;22(12):1149–53.
- 364 6. Zentall TR. Animals represent the past and the future. *Evolutionary Psychology*. 2013 Jul  
365 1;11(3):573–90.
- 366 7. Rugg MD, Fletcher PC, Frith CD, Frackowiak RSJ, Dolan RJ. Brain regions supporting intentional  
367 and incidental memory: a PET study. *Neuroreport*. 1997 Mar 24;8(5):1283–7.
- 368 8. Trivedi MA, Murphy CM, Goetz C, Shah RC, Gabrieli JDE, Whitfield-Gabrieli S, et al. fMRI  
369 activation changes during successful episodic memory encoding and recognition in amnesic mild  
370 cognitive impairment relative to cognitively healthy older adults. *Dement Geriatr Cogn Disord*.  
371 2008;26(2):123–37.
- 372 9. Wang WC, Giovanello KS. The role of medial temporal lobe regions in incidental and intentional  
373 retrieval of item and relational information in aging. *Hippocampus*. 2016 Jun;26(6):693–9.



- 374 10. Kuhnert MT, Bialonski S, Noennig N, Mai H, Hinrichs H, Helmstaedter C, et al. Incidental and  
375 intentional learning of verbal episodic material differentially modifies functional brain networks.  
376 PLoS One. 2013 Nov 18;8(11):e80273.
- 377 11. Keller FS. Light-aversion in the white rat. Psychol Rec. 1941 May 25;4(17):235–50.
- 378 12. Fanselow MS. Neural organization of the defensive behavior system responsible for fear. Psychon  
379 Bull Rev. 1994 Dec;1(4):429–38.
- 380 13. Wendt J, Löw A, Weymar M, Lotze M, Hamm AO. Active avoidance and attentive freezing in the  
381 face of approaching threat. Neuroimage. 2017 Sep;158:196–204.
- 382 14. Borbély AA, Neuhaus HU. Daily pattern of sleep, motor activity and feeding in the rat: Effects of  
383 regular and gradually extended photoperiods. J Comp Physiol. 1978;124(1):1–14.
- 384 15. Barker DJ, Sanabria F, Lasswell A, Thrailkill EA, Pawlak AP, Killeen PR. Brief light as a practical  
385 aversive stimulus for the albino rat. Behavioural Brain Research. 2010 Dec 25;214(2):402–8.
- 386 16. Wickham H. ggplot2: Elegant graphics for data analysis. Springer-Verlag New York; 2016.
- 387 17. Venables WN, Ripley BD. Modern Applied Statistics with S. Fourth edition. New York: Springer;  
388 2002.
- 389 18. McEchron MD, Cheng AY, Gilmartin MR. Trace fear conditioning is reduced in the aging rat.  
390 Neurobiol Learn Mem. 2004 Sep;82(2):71–6.
- 391 19. Sharma V, Cohen N, Sood R, Ounallah-Saad H, Gal Ben-Ari S, Rosenblum K. Trace fear  
392 conditioning: procedure for assessing complex hippocampal function in mice. Bio Protoc. 2018  
393 Aug 20;8(16):e2475.
- 394 20. Blanchard DC, Griebel G, Pobbe R, Blanchard RJ. Risk assessment as an evolved threat detection  
395 and analysis process. Neurosci Biobehav Rev. 2011 Mar;35(4):991–8.
- 396 21. Sato N. Episodic-like memory of rats as retrospective retrieval of incidentally encoded locations  
397 and involvement of the retrosplenial cortex. Sci Rep. 2021 Dec 26;11(1):2217.
- 398 22. Kim K, Vöröslakos M, Seymour JP, Wise KD, Buzsáki G, Yoon E. Artifact-free and high-temporal-  
399 resolution in vivo opto-electrophysiology with microLED optoelectrodes. Nat Commun. 2020 Dec  
400 28;11(1):2063.
- 401 23. Scott BB, Thiberge SY, Guo C, Tervo DGR, Brody CD, Karpova AY, et al. Imaging cortical dynamics  
402 in GCaMP transgenic rats with a head-mounted widefield macroscope. Neuron. 2018  
403 Dec;100(5):1045-1058.e5.
- 404 24. Morris RG. Episodic-like memory in animals: psychological criteria, neural mechanisms and the  
405 value of episodic-like tasks to investigate animal models of neurodegenerative disease. Philos  
406 Trans R Soc Lond B Biol Sci. 2001 Sep 29;356(1413):1453–65.
- 407 25. Binder S, Dere E, Zlomuzica A. A critical appraisal of the what-where-when episodic-like memory  
408 test in rodents: Achievements, caveats and future directions. Prog Neurobiol. 2015 Jul;130:71–  
409 85.

- 410 26. Eichenbaum H, Fortin NJ, Ergorul C, Wright SP, Agster KL. Episodic recollection in animals: “If it  
411 walks like a duck and quacks like a duck....” *Learn Motiv.* 2005 May;36(2):190–207.
- 412 27. Clayton NS, Bussey TJ, Dickinson A. Can animals recall the past and plan for the future? *Nat Rev*  
413 *Neurosci.* 2003 Aug;4(8):685–91.
- 414 28. Clayton NS, Bussey TJ, Emery NJ, Dickinson A. Prometheus to Proust: the case for behavioural  
415 criteria for ‘mental time travel.’ *Trends Cogn Sci.* 2003 Oct;7(10):436–7.
- 416

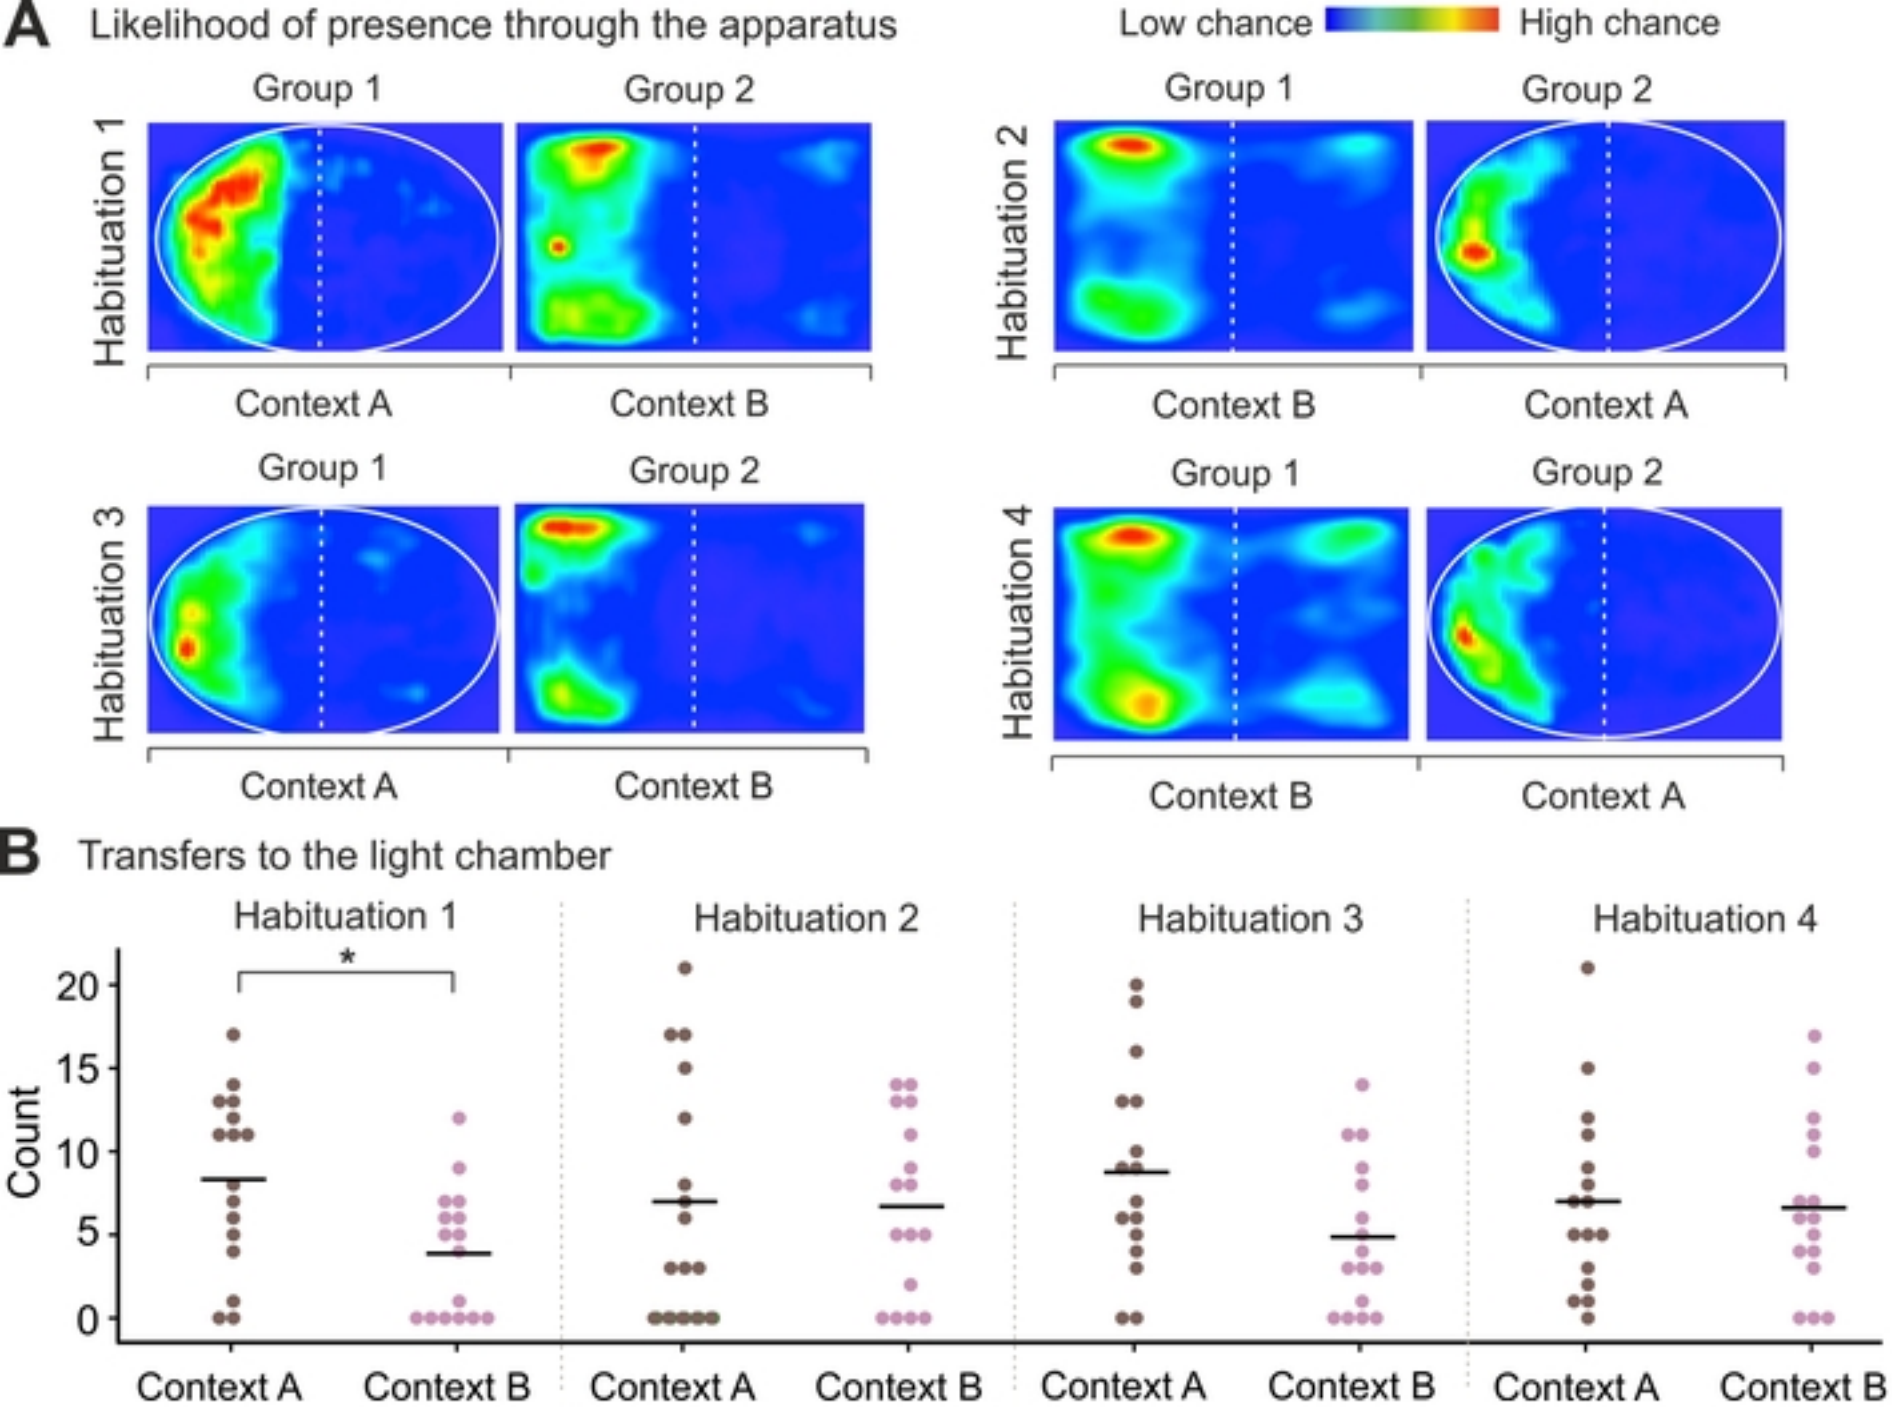

Fig2

**A** Number of included and excluded animals**B** Experimental group composition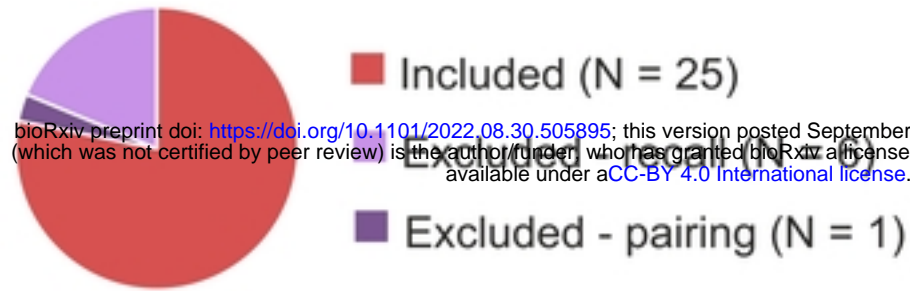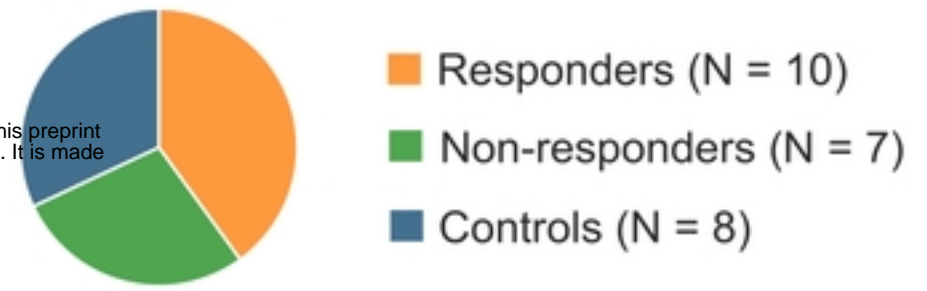**C** Latency to escape during pairing session**D** Latency to escape by responders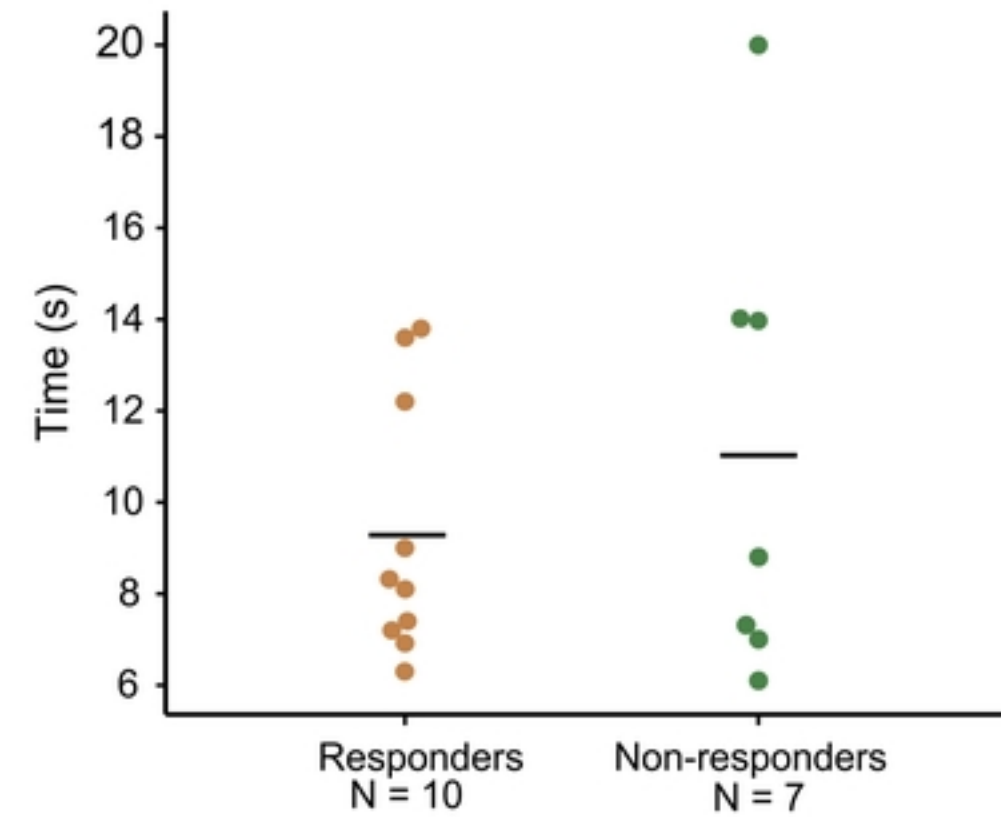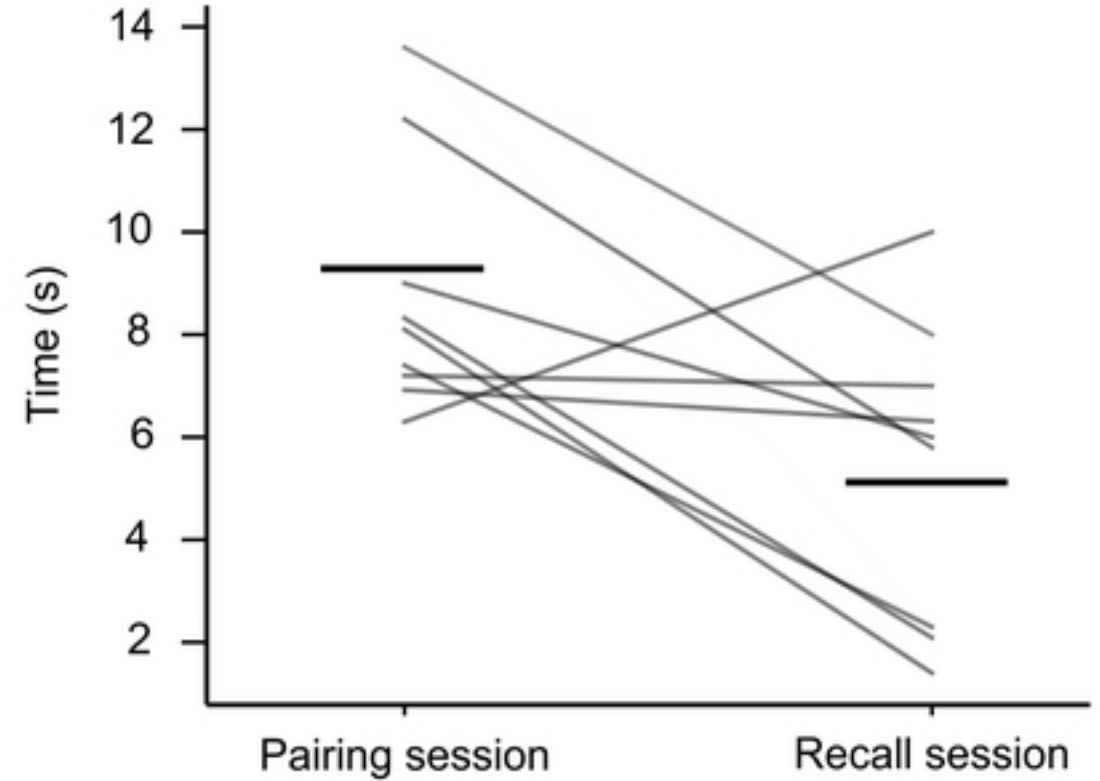**E** Time spent in dark chamber**F** Transfers to light chamber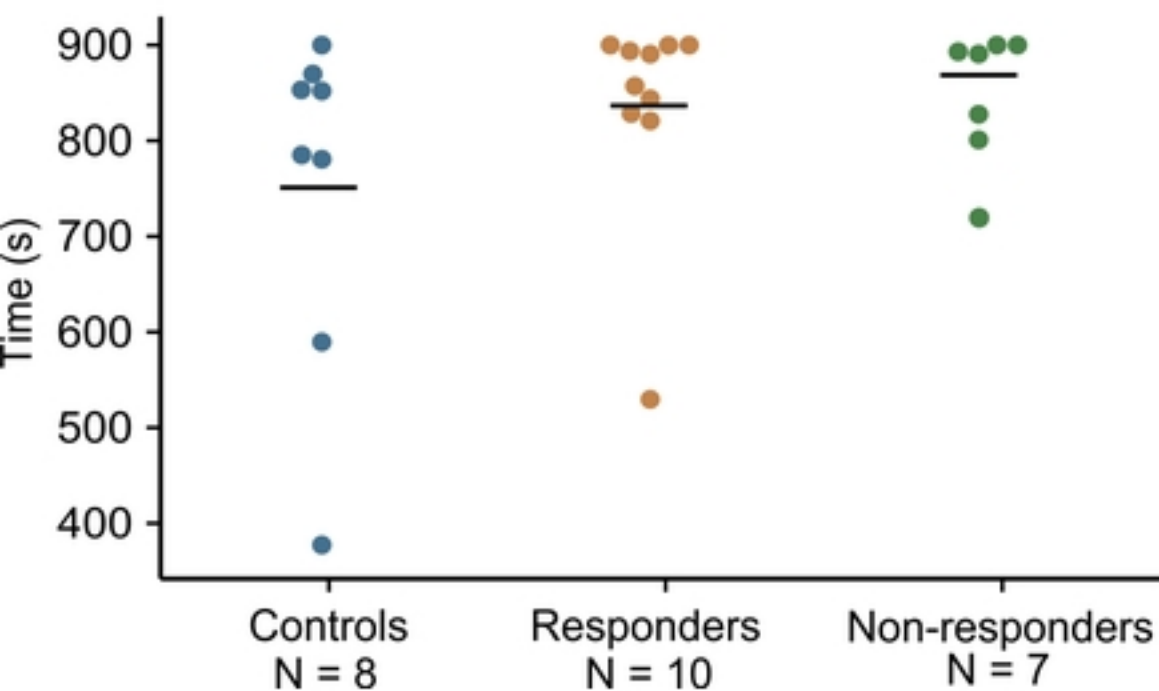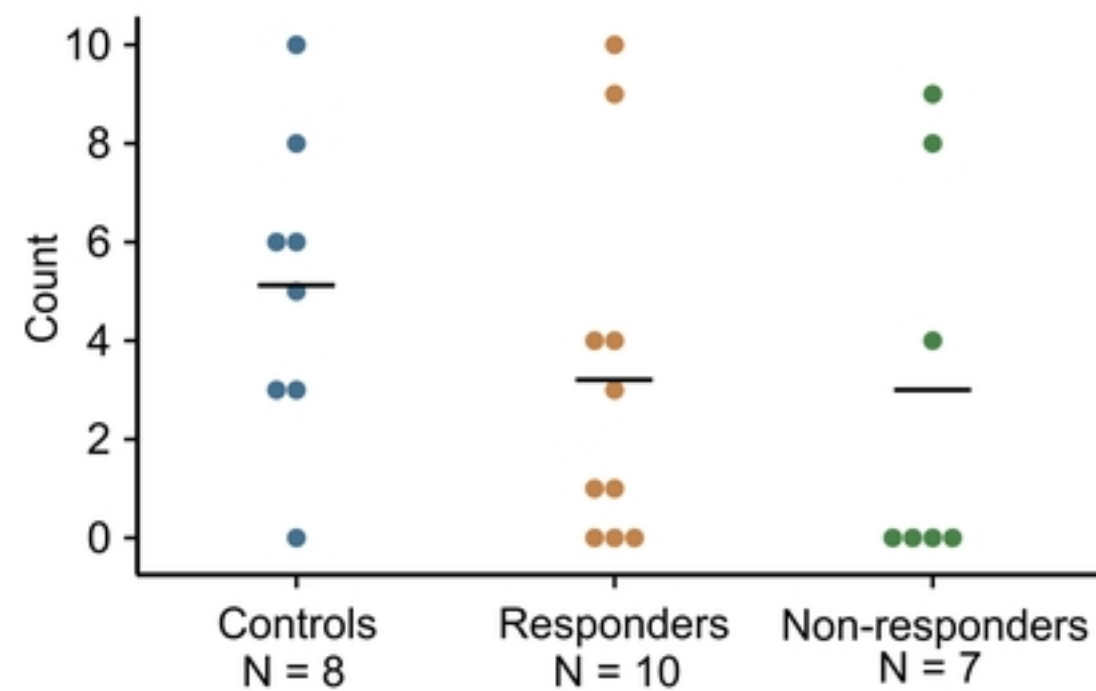**Fig4**



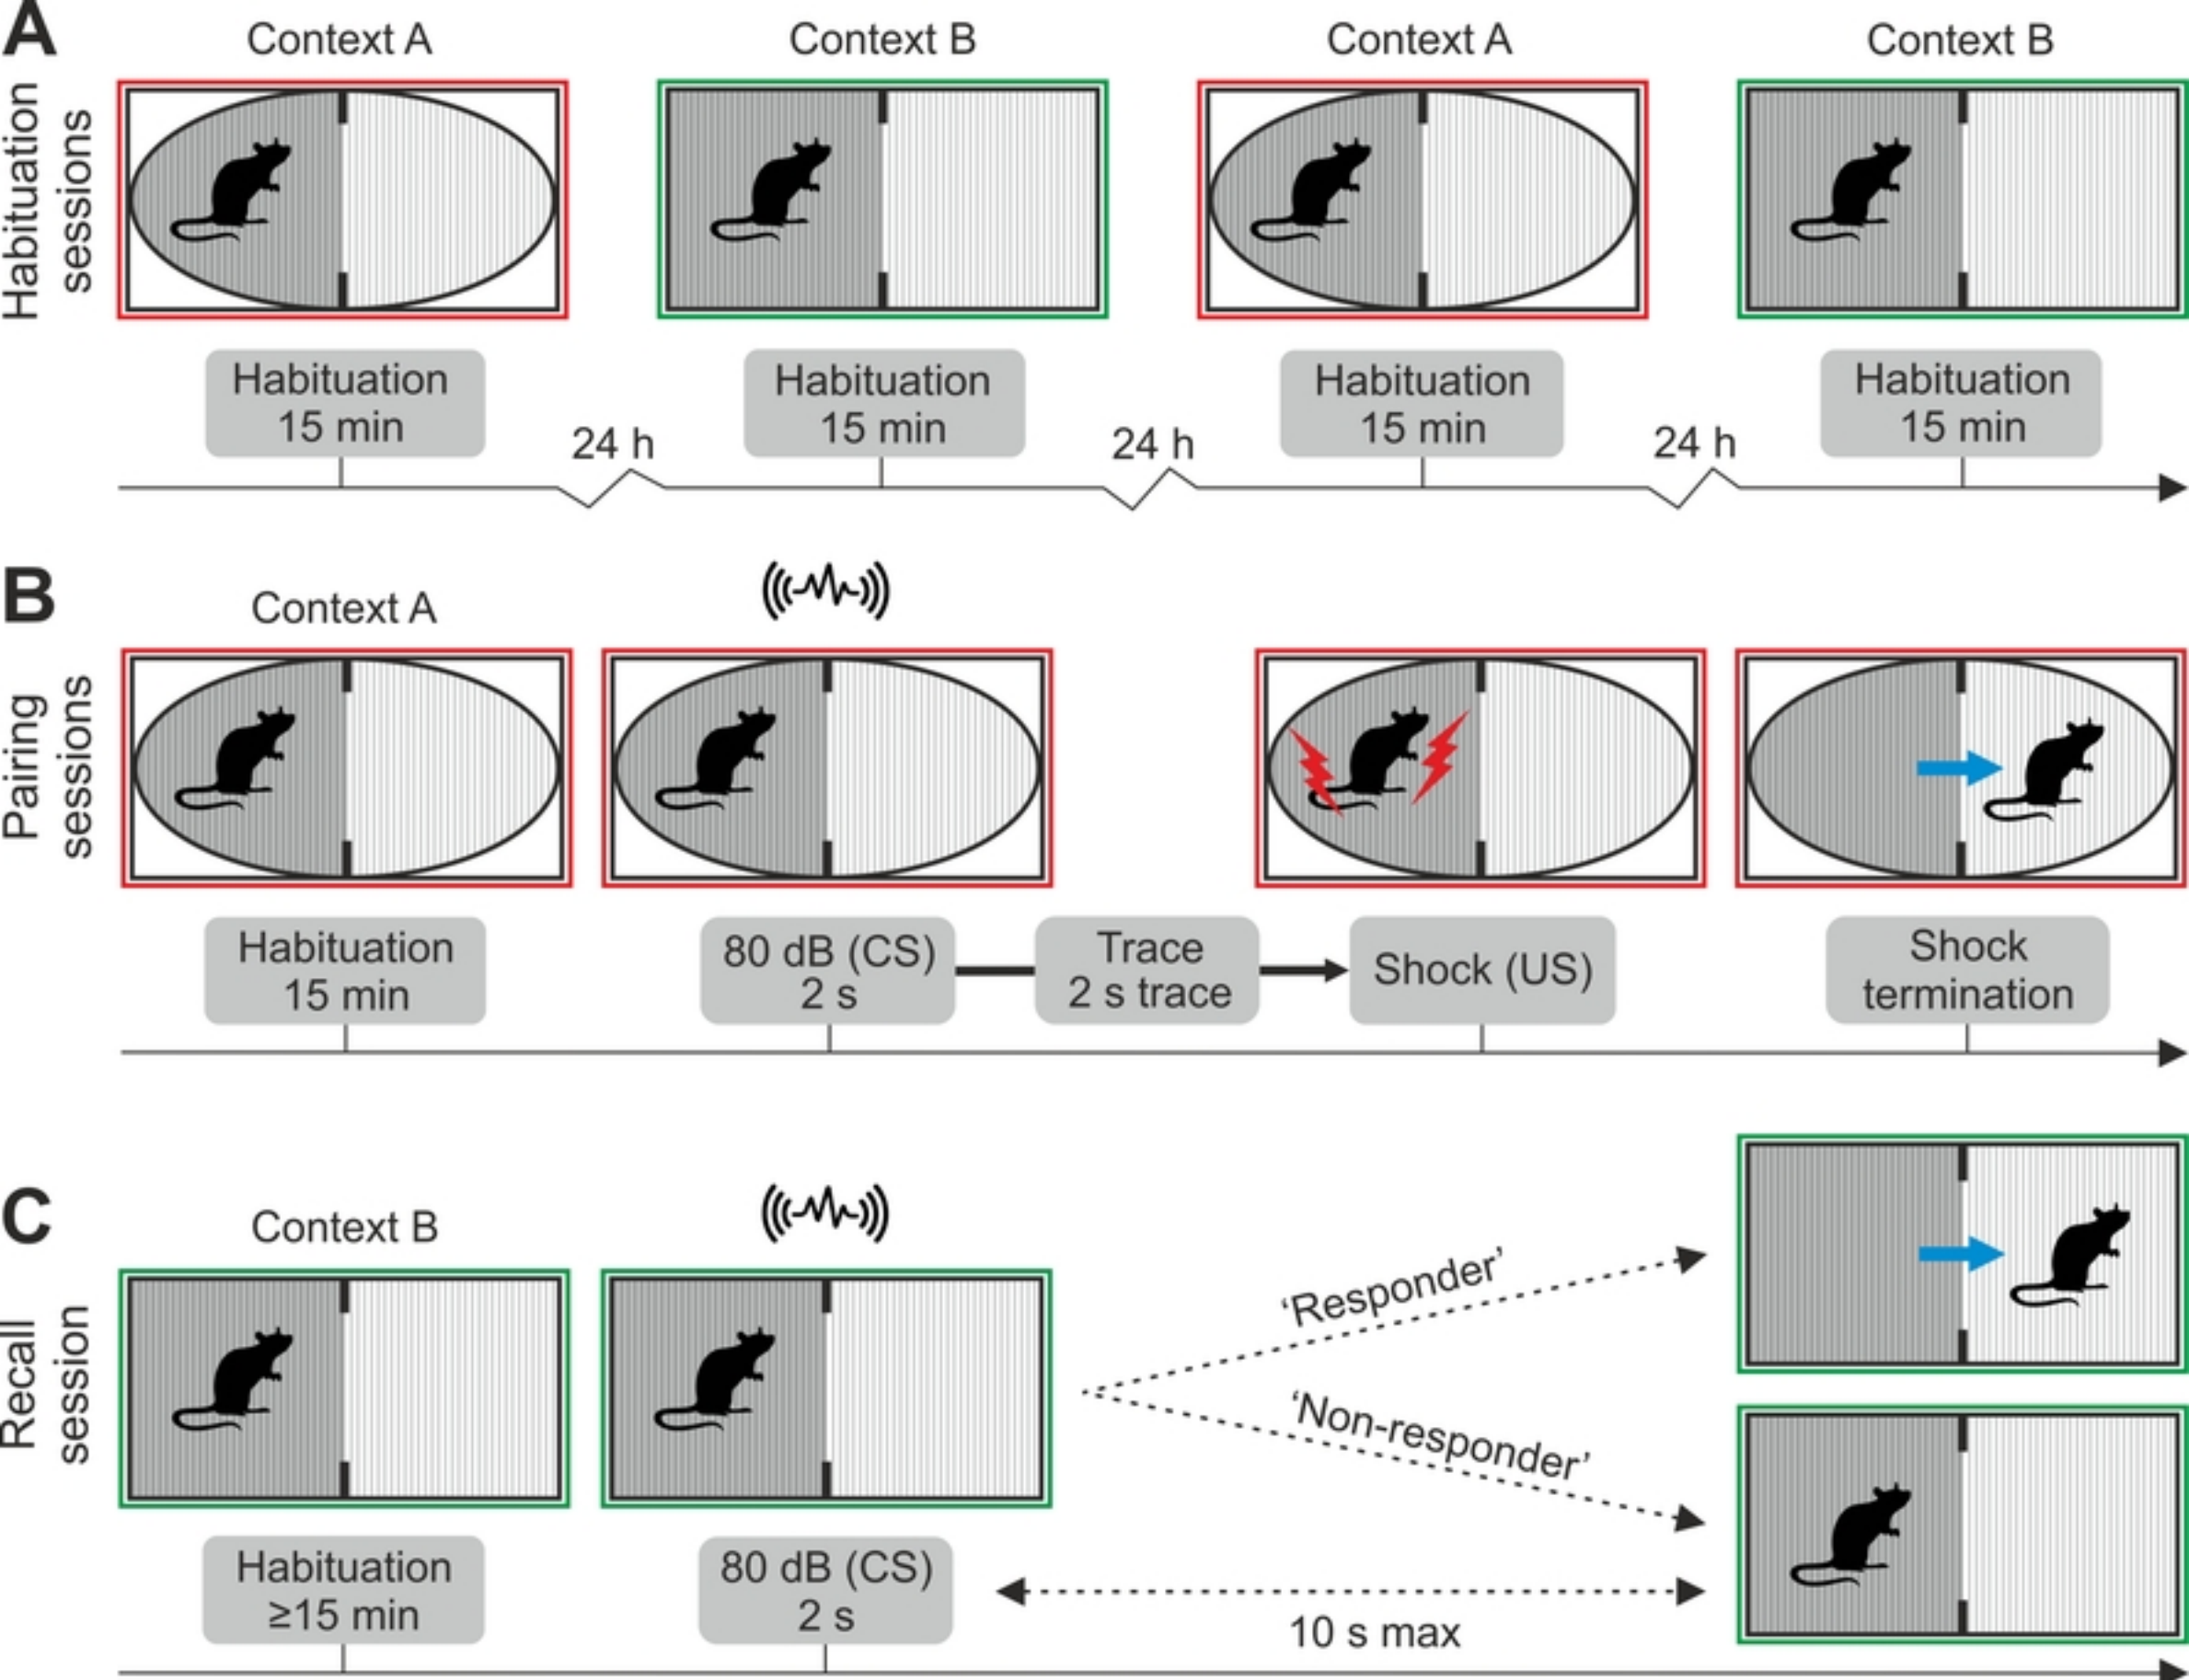

Fig 1
